# Supplementary material
Source: PubMed Central journal article supplement (PMC9936254)
Supplement: EIJ-D-22-00732_Toma_SD.pdf [file EIJ-D-22-00732_Toma_SD.pdf]

## Supplementary data

### Supplementary Table 1. Current inclusion and exclusion criteria.

| <b>Inclusion Criteria</b>                                                                                                                                |
|----------------------------------------------------------------------------------------------------------------------------------------------------------|
| Age $\geq$ 18 years                                                                                                                                      |
| Clinical signs and symptoms consistent with acute PE                                                                                                     |
| Echo, CTPA, or pulmonary angiographic evidence of proximal filling defect in at least one main or lobar pulmonary artery                                 |
| Scheduled for PE treatment with the FlowTriever System per the Investigator's discretion                                                                 |
| <b>Exclusion Criteria</b>                                                                                                                                |
| Unable to anticoagulate with heparin or alternative                                                                                                      |
| Diagnosis with a minor PE with $< 0.9$ RV/LV ratio                                                                                                       |
| Known sensitivity to radiographic contrast agents that, in the Investigator's opinion, cannot be adequately pre-treated                                  |
| Imaging evidence or other evidence that suggests, in the Investigator's opinion, the patient is not appropriate for mechanical thrombectomy intervention |
| Life expectancy $< 30$ days, as determined by the Investigator                                                                                           |
| Current participation in another drug or device treatment study that, in the Investigator's opinion, would interfere with participation in this study    |

CTPA: computed tomography pulmonary angiography; LV: left ventricle; PE: pulmonary embolism; RV: right ventricle.

**Supplementary Table 2. Relative and absolute contraindications to thrombolytics.**

| <b>Relative</b>                                       |
|-------------------------------------------------------|
| Blood pressure of $\geq 180/110$ mmHg                 |
| Recent bleeding, surgery, or invasive procedure       |
| Ischemic stroke more than 3 months previously         |
| Anticoagulation therapy                               |
| Traumatic cardiopulmonary resuscitation               |
| Pericarditis or pericardial fluid                     |
| Diabetic retinopathy                                  |
| Pregnancy                                             |
| Age $>75$ years                                       |
| Weight $<60$ kg                                       |
| <b>Absolute</b>                                       |
| Previous intracranial hemorrhage at any time          |
| Ischemic stroke in the past 3 months                  |
| Active bleeding                                       |
| Recent neurological procedure                         |
| Recent head trauma involving fracture or brain injury |
| Bleeding diathesis                                    |
| Structural intracranial disease                       |

**Supplementary Table 3. Listing of SAE at 48 hours.**

| <b>SAEs</b>                     | <b>N=35</b> |
|---------------------------------|-------------|
| Anemia                          | 4           |
| Acute respiratory failure       | 2           |
| Atrial fibrillation             | 1           |
| Atrial thrombosis               | 1           |
| Blood loss anemia               | 1           |
| Bradycardia                     | 1           |
| Bundle branch block left        | 1           |
| Cardiac procedure complication  | 1           |
| Cardio-respiratory arrest       | 1           |
| Cerebrovascular accident        | 1           |
| Chest discomfort                | 1           |
| Deep vein thrombosis            | 2           |
| Hemoglobin decreased            | 1           |
| Hemorrhage                      | 1           |
| Hypotension                     | 1           |
| Hypovolemic shock               | 1           |
| Peripheral ischemia             | 1           |
| Pulmonary embolism              | 2           |
| Retroperitoneal hematoma        | 2           |
| Shock                           | 1           |
| Vascular access site hematoma   | 4           |
| Vascular access site hemorrhage | 2           |
| Vascular pseudoaneurysm         | 1           |
| Ventricular tachycardia         | 1           |

SAE terms follow Medical Dictionary for Regulatory Activities (MedDRA) terminology.  
SAE: serious adverse event.

**Supplementary Table 4. PI and sites.**

| <b>PI</b>                                | <b>Site</b>                                                               |
|------------------------------------------|---------------------------------------------------------------------------|
| Toma, Catalin<br>(Global FLASH PI)       | University of Pittsburgh Medical Center (Pittsburgh, PA)                  |
| Jaber, Wissam                            | Emory University (Atlanta, GA)                                            |
| Weinberg, Mitchell                       | Northwell Health (Staten Island, NY)                                      |
| Bunte, Matthew; Wible, Brandt            | Saint Luke's MidAmerica Heart Institute (Kansas City, MO)                 |
| Stegman, Brian                           | CentraCare Heart & Vascular Center (St. Cloud, MN)                        |
| Khandhar, Sameer                         | University of Pennsylvania (Philadelphia, PA)                             |
| Gondi, Sreedevi                          | Baptist Health Louisville (Louisville, KY)                                |
| Chambers, Jeffrey                        | Metropolitan Heart & Vascular Institute (Minneapolis, MN)                 |
| Amin, Rohit                              | Ascension Sacred Heart Hospital (Pensacola, FL)                           |
| Leung, Daniel                            | Christiana Care Health Services (Newark, DE)                              |
| Pollak, Jeffrey                          | Yale University (New Haven, CT)                                           |
| Kado, Herman                             | Ascension Providence Hospital (Southfield, MI)                            |
| Sarosi, Michael                          | St. Joseph Mercy Hospital (Ann Arbor, MI)                                 |
| Brown, Michael                           | Missouri Cardiovascular Specialists (Columbia, MO)                        |
| Castle, Jordan                           | Inland Imaging, Providence Sacred Heart (Spokane, WA)                     |
| Bhat, Ambarish                           | University of Missouri, Columbia (Columbia, MO)                           |
| Savin, Michael                           | Oakland University William Beaumont School of Medicine<br>(Royal Oak, MI) |
| Siskin, Gary                             | Albany Medical Center (Albany, NY)                                        |
| Beam, Daren/Stewart, Lauren<br>Kathryn   | Indiana University School of Medicine (Indianapolis, IN)                  |
| Brancheau, Daniel                        | Ascension Genesys Hospital (Grand Blanc, MI)                              |
| Ahmed, Mustafa                           | UAB Division of Cardiovascular Disease (Birmingham, AL)                   |
| Rosenberg, Michael; Fanola,<br>Christina | University of Minnesota (Minneapolis, MN)                                 |
| Elmasri, Fakhir                          | Lakeland Vascular Institute (Lakeland, FL)                                |
| Zlotnick, David                          | SUNY, The University at Buffalo (Buffalo, NY)                             |
| Bisharat, Mohannad                       | Memorial Hospital Jacksonville (Jacksonville, FL)                         |

|                                                        |                                                               |
|--------------------------------------------------------|---------------------------------------------------------------|
| Butros, Paul                                           | Inova Health System (Fairfax, VA)                             |
| Koenig, Gerald                                         | Henry Ford Health System (Detroit, MI)                        |
| Zybulewski, Adam; *Olivieri, Brandon, *Beasley, Robert | Mount Sinai Medical Center of Florida (Miami, FL)             |
| Angel, Wesley; Roberts, Jon                            | Methodist Healthcare Foundation (Germantown, TN)              |
| Kerrigan, Jimmy                                        | Ascension St. Thomas West (Nashville, TN)                     |
| Li, Jun                                                | University Hospitals Cleveland Medical Center (Cleveland, OH) |
| Schimmel, Daniel                                       | Northwestern University (Chicago, IL)                         |
| Balderman, Joshua                                      | Pima Heart and Vascular (Tucson, AZ)                          |
| Patton, Marquand                                       | Palmetto General Hospital (Hialeah, FL)                       |
| Walker, Chris                                          | UTMC Knoxville (Knoxville, TN)                                |
| Gonsalves, Carin                                       | Thomas Jefferson University (Philadelphia, PA)                |
| Kasmikha, Zaid; *Qaqi, Osama                           | Ascension Providence Rochester Hospital (Rochester, MI)       |
| Veerina, Kalyan                                        | Opelousas General (Opelousas, LA)                             |
| Dexter, David                                          | Sentara (Norfolk, VA)                                         |
| Lookstein, Robert                                      | Mount Sinai Medical Center (New York, NY)                     |
| Lasic, Zoran                                           | Jamaica Hospital/Lenox Hill (New York, NY)                    |
| Mahjoobi, Maziar                                       | Texoma Medical Center (Denison, TX)                           |
| Paul, Jonathan                                         | University of Chicago (Chicago, IL)                           |
| Tumuluri, Ramagopal                                    | Aurora St. Luke's Medical Center (Milwaukee, WI)              |
| Horowitz, James                                        | NYU Langone Medical Center (New York, NY)                     |
| Lee, Justin                                            | Sarasota Memorial (Sarasota, FL)                              |
| Leonardi, Robert                                       | Lexington Medical Center (Lexington, KY)                      |
| Patel, Mitul                                           | Valley Health (Ridgewood, NJ)                                 |
| Rothschild, Daniel                                     | Norton Healthcare (Louisville, KY)                            |
| Tabriz, David                                          | Rush University Medical Center (Chicago, IL)                  |

\*Past PIs. PI: principal investigator.
